# Supplementary material for: Growth of two-dimensional rhenium disulfide (ReS2) nanosheets with a few layers at low temperature
Source: Royal Society of Chemistry journal article supplement (doi:10.1039/c7ce00926g), 2017-01-01
Supplement: c7ce00926g1.pdf [file c7ce00926g1.pdf]

## Electronic Supplementary Information (ESI)

### Growth of two-dimensional rhenium disulfide (ReS<sub>2</sub>) nanosheets with a few layers at low temperature

Saeah Kim<sup>a,e</sup>, Hak Ki Yu<sup>b,e</sup>, Seokhyun Yoon<sup>c</sup>, Nam-Suk Lee<sup>d\*</sup>, and Myung Hwa Kim<sup>a\*</sup>

<sup>a</sup>*Department of Chemistry & Nano Science, Ewha Womans University, Seoul, 120-750, Korea*

<sup>b</sup>*Department of Materials Science and Engineering and Department of Energy Systems Research, Ajou University, Suwon, 443-749, Korea*

<sup>c</sup>*Department of Physics, Ewha Womans University, Seoul, 120-750, Korea*

<sup>d</sup>*National Institute for Nanomaterials Technology (NINT), Pohang University of Science and Technology (POSTECH), Pohang, 790-784, Korea*

<sup>e</sup>Authors contributed equally to this work.

\*To whom all correspondence should be addressed: [myungkim@ewha.ac.kr](mailto:myungkim@ewha.ac.kr),

[nslee@postech.ac.kr](mailto:nslee@postech.ac.kr)

**Fig. S1**

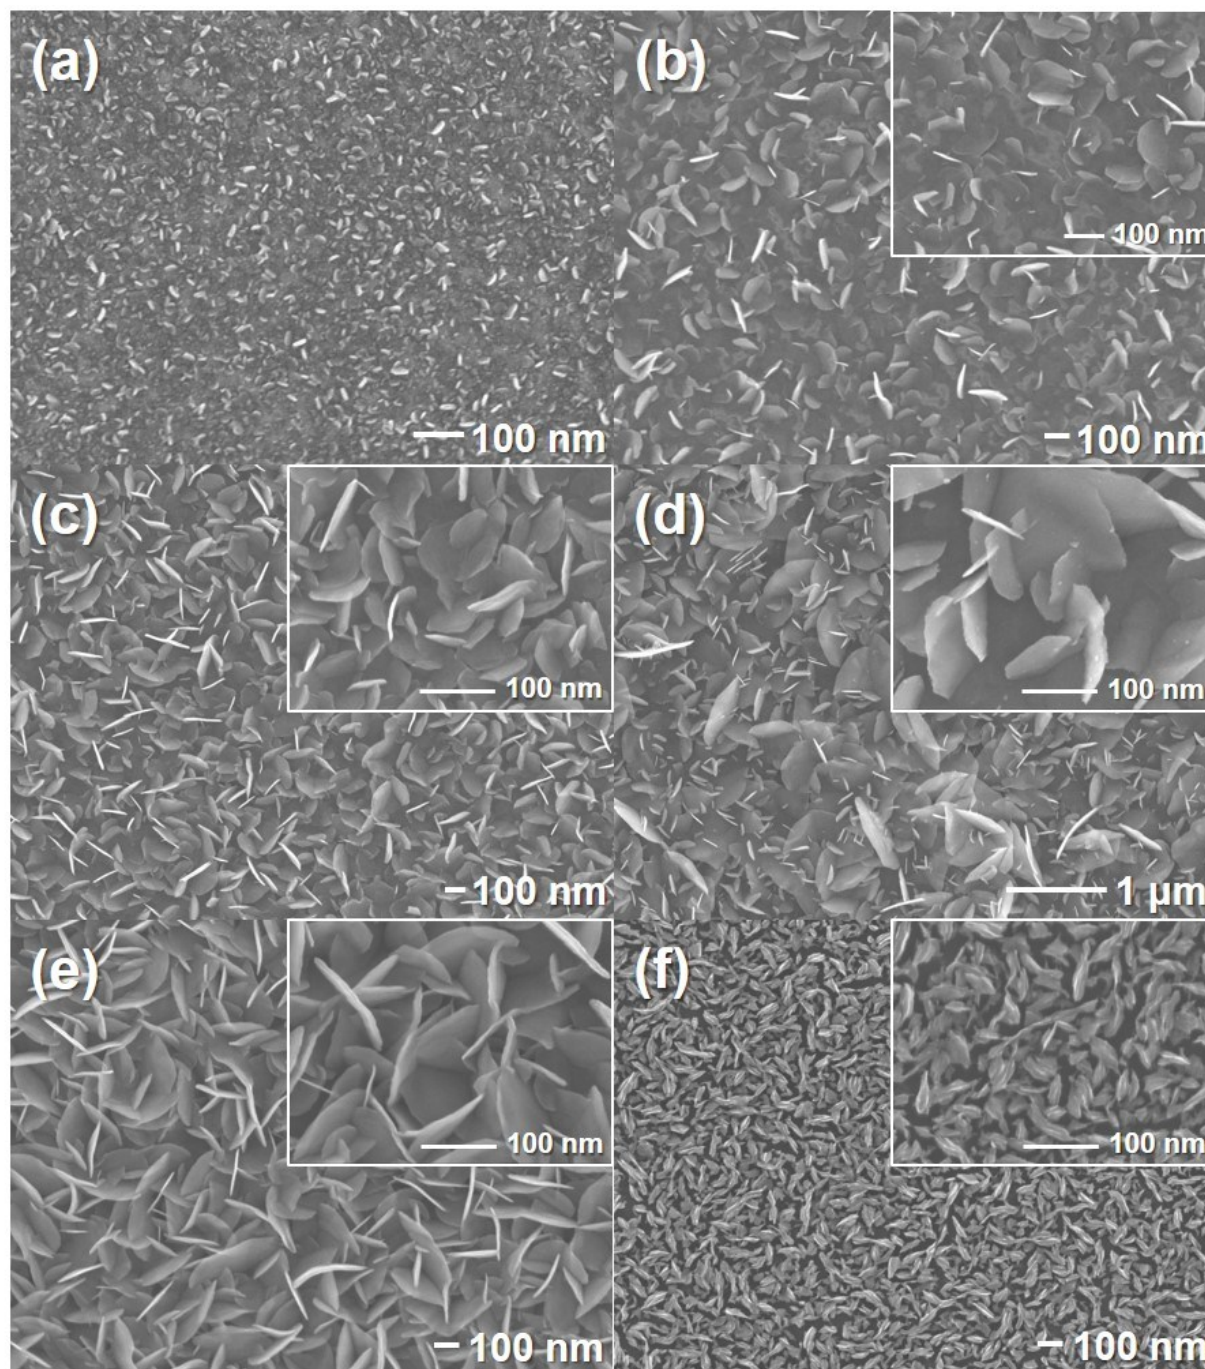

**Fig. S1** The temperature dependence of the growth for the ReS<sub>2</sub> nanosheets under the flow of He carrier gas of 10 sccm for 20 minutes: (a) 350°C, (b) 400°C, (c) 450°C, (d) 500°C, (e) 550°C, and (f) 600°C, respectively.

Fig. S2

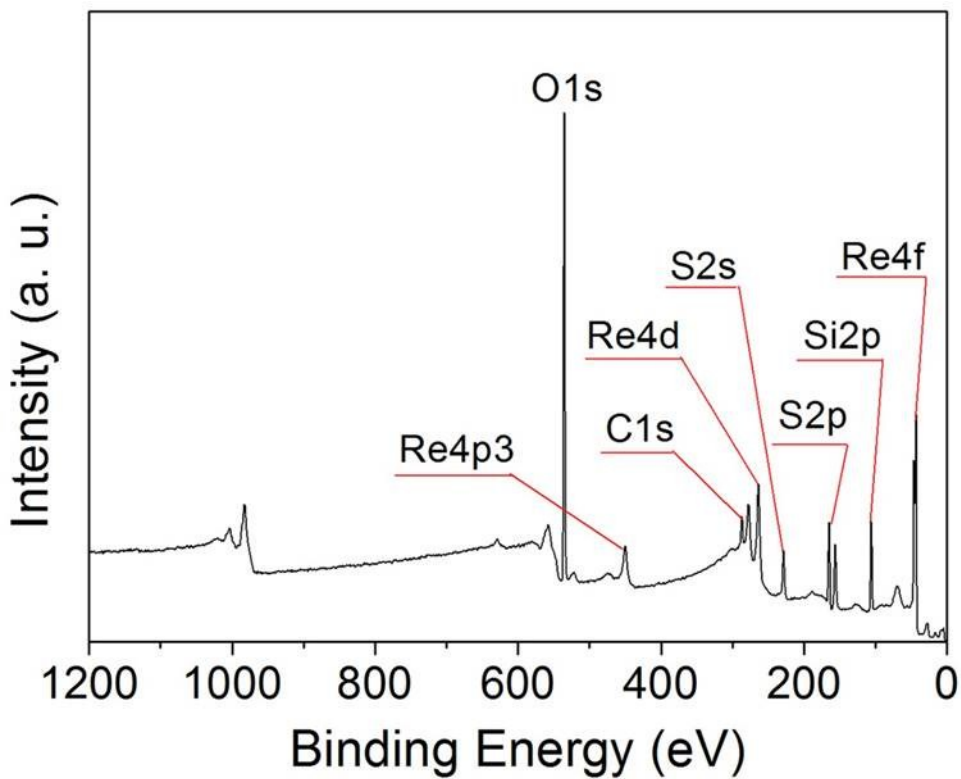

| Name | Start BE (eV) | Peak BE (eV) | End BE (eV) | Height (CPS) | FWHM (eV) | Area (CPS.eV) | Atomic (%) |
|------|---------------|--------------|-------------|--------------|-----------|---------------|------------|
| O1s  | 538.99        | 533.32       | 528.38      | 66091.59     | 1.51      | 111126.49     | 32.74      |
| S2p  | 167.58        | 163.19       | 159.38      | 10169.59     | 1.94      | 20161.07      | 9.50       |
| C1s  | 292.95        | 284.87       | 281.78      | 3828.51      | 2.06      | 10157.84      | 8.20       |
| Re4f | 49.29         | 42.62        | 39.03       | 32546.24     | 1.12      | 69137.90      | 4.80       |

Fig. S2 X-ray photoelectron survey spectrum for the ReS<sub>2</sub> nanosheets grown at 450°C under the flow of He carrier gas of 10 sccm for 20 minutes.

**Fig. S3**

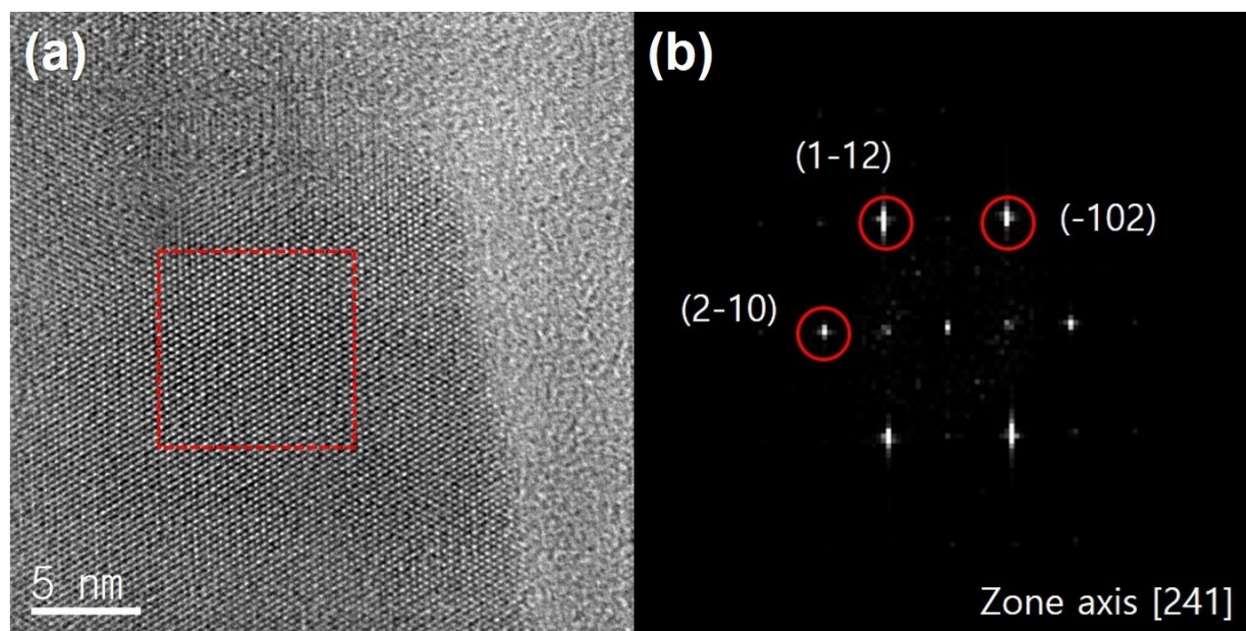

**Fig. S3** Filtered Z-contrast HAADF-STEM and the corresponding FFT image of ReS<sub>2</sub> nanosheets taken at [241] zone axis .

**Fig. S4**

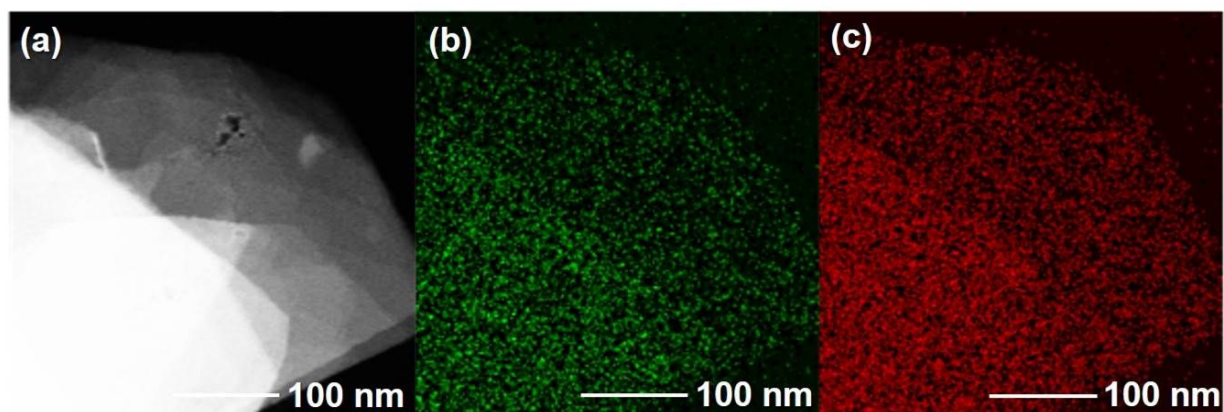

**Fig. S4** Energy dispersive X-ray (EDX) elemental mapping analysis of the  $\text{ReS}_2$  nanosheets. (a) HAADF-STEM image, (b) Re L series and (c) S K series.

**Fig. S5.**

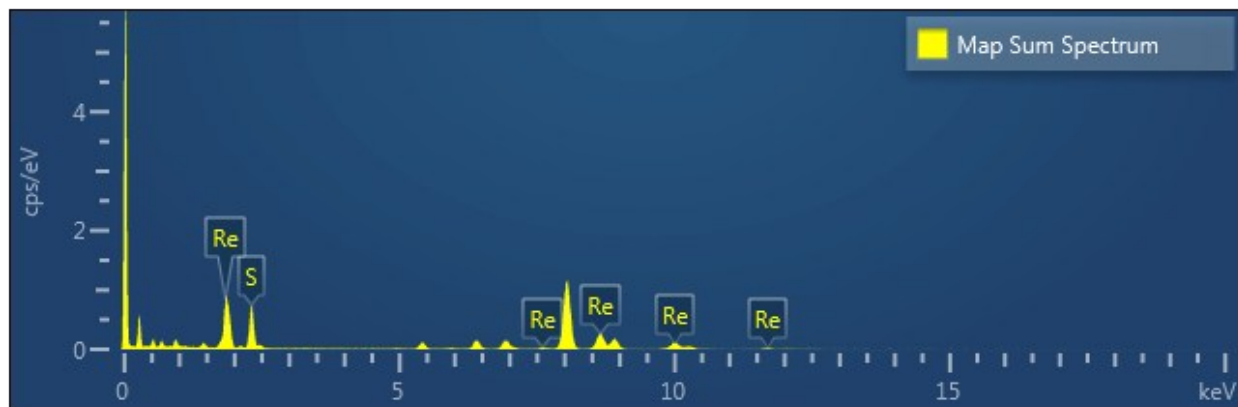

| Element | Line Type | k Factor | k Factor type | Absorption Correction | Wt%    | Wt% Sigma | Atomic% |
|---------|-----------|----------|---------------|-----------------------|--------|-----------|---------|
| S       | K series  | 0.982    |               | 1.00                  | 27.63  | 0.50      | 68.91   |
| Re      | M series  | 1.665    |               | 1.00                  | 72.37  | 0.50      | 31.09   |
| Total   |           |          |               |                       | 100.00 |           | 100.00  |

**Fig. S5** TEM-EDS spectrum for the ReS<sub>2</sub> nanosheets grown at 450°C under the flow of He carrier gas of 10 sccm for 20 minutes.
